# Supplementary material for: “Let me explain!”: exploring the potential of virtual agents in explainable AI interaction design
Source: Springer Nature journal article supplement (doi:10.1007/s12193-020-00332-0), 2020-07-09
Supplement: MOESM1 [file 18167762]

## Personal Information

Age: \_\_\_\_\_

Gender:

- male
- female
- other

Do you have a red-green vision impairment?

- yes
- no

Have you ever interacted with language assistants?

- yes, namely: \_\_\_\_\_
- no

Do you have any experience with audio signal processing?

- yes, namely: \_\_\_\_\_
- no

Have you interacted with virtual agents before?

- yes, namely: \_\_\_\_\_
- no

**Tell the experimenter when you are ready to start, then the test of the speech recognition system will begin.**

## Test of the speech recognition system

Please document your testing of the speech recognition system. Fill in the following fields after each run:

### 1. word

Word spoken by you: **dog**                      Recognized word by the system: \_\_\_\_\_

The visualization was helpful:

- yes
- no
- don't know

### 2. word

Word spoken by you: **four**                      Recognized word by the system: \_\_\_\_\_

The visualization was helpful:

- yes
- no
- don't know

### 3. word

Word spoken by you: **happy**                      Recognized word by the system: \_\_\_\_\_

The visualization was helpful:

- yes
- no
- don't know

### 4. word

Word spoken by you: **core**                      Recognized word by the system: \_\_\_\_\_

The visualization was helpful:

- yes
- no
- don't know

### 5th word

Word spoken by you: **on**                      Recognized word by the system: \_\_\_\_\_

The visualization was helpful:

- yes
- no
- don't know

**6th word**Word spoken by you: **right**

Recognized word by the system:\_\_\_\_\_

The visualization was helpful:

- yes  
 no  
 don't know

**7th word**Word spoken by you: **eleven**

Recognized word by the system:\_\_\_\_\_

The visualization was helpful:

- yes  
 no  
 don't know

**8th word**Word spoken by you: **two**

Recognized word by the system:\_\_\_\_\_

The visualization was helpful:

- yes  
 no  
 don't know

**9th word**Word spoken by you: **seven**

Recognized word by the system:\_\_\_\_\_

The visualization was helpful:

- yes  
 no  
 don't know

**10th word**Word spoken by you: **cat**

Recognized word by the system:\_\_\_\_\_

The visualization was helpful:

- yes  
 no  
 don't know

**Thank you for your help, the testing of the speech recognition system is done.  
Please turn to the next page. There we would like to ask you a few more questions.**

## Agent and System Evaluation

In the following we ask you to rate the virtual agent Gloria and the speech recognition system.

The questions about the virtual agent Gloria were only asked when the participant were in one of the agent groups

Please begin your evaluation of **Gloria**.

I liked Gloria:

disagree         fully agree

I would interact with Gloria again:

disagree         fully agree

Gloria is trustworthy:

disagree         fully agree

Gloria's answers are understandable:

disagree         fully agree

The information Gloria gave me helped me to understand the decisions of the system:

do not agree         fully agree

What did you particularly like about Gloria?

---

---

---

What did you find particularly bad about Gloria?

---

---

---

In the following, we ask you to evaluate the **speech recognition system**.

The speech recognition system is trustworthy:

disagree        fully agree

The speech recognition system is comprehensible:

disagree        fully agree

I would use the speech recognition system:

disagree        fully agree

(Questionnaire adapted from Jian et al. (2010))

Below is a list of statement for evaluating trust between people and automation. There are several scales for you to rate intensity of your feeling of trust, or your impression of the speech recognition system

Please mark an **x** on each line at the point which best describes your feeling or your impression.

If you do not understand something, you can always contact the experimenter!

(not at all=1; extremely=7)

The system is deceptive.

1 7

The system behaves in an underhanded manner.

1 7

I am suspicious of the system's intent, action, or outputs.

1 7

I am wary of the system.

1 7

The system's actions will have a harmful or injurious outcome.

1 7

I am confident in the system.

1 7

The system provides security.

1 7

The system has integrity.

1 7

The system is dependable.

1 7

The system is reliable.

1 7

I can trust the system.

1 7

I am familiar with the system.

1 7

## Final Questions

Do you feel that the visual explanations available were sufficient?

disagree         fully agree

What other/further explanations would have been helpful to you during the test?

---

---

---

Anything else you want to share?

---

---

---

**This question was only asked when the participant was in the textual agent group**

Did you read Gloria's informations?

never         always

**Thank you for your participation!**
